# Supplementary material
Source: ML conference proceedings conference paper supplement (https://proceedings.neurips.cc/paper_files/paper/2019/hash/0c72cb7ee1512f800abe27823a792d03-Abstract.html)
Supplement: Supplementary file [file 0c72cb7ee1512f800abe27823a792d03-Supplemental.zip]

---

## Supplementary Material for DRUM: End-to-End Differentiable Rule Mining on Knowledge Graphs

---

**Theorem 1.** *If  $R_o, R_s$  are two rules of length  $T$  obtained by optimizing the objective related to  $\Omega_H^I$ , with confidence values  $\alpha_o, \alpha_s$ , then there exists  $\ell$  rules of length  $T$ ,  $R_1, R_2, \dots, R_\ell$ , with confidence values  $\alpha_1, \alpha_2, \dots, \alpha_\ell$  such that:*

$$\begin{aligned} d(R_o, R_1) = d(R_\ell, R_s) = 1 \quad \text{and} \quad d(R_o, R_s) \leq \ell + 1, \\ d(R_l, R_{l+1}) = 1 \quad \text{and} \quad \alpha_l \geq \min(\alpha_o, \alpha_s) \quad \text{for} \quad 1 \leq l \leq \ell, \end{aligned}$$

where  $d(.,.)$  is a distance between two rules of the same size defined as the number of mismatched atoms between them.

*Proof.* Define:

$$\mathbf{a}^* \doteq \arg \max_{\mathbf{a}} O_H^I(\mathbf{a}) = \sum_{(x,H,y) \in KG} \mathbf{v}_x^T \Omega_H^I(\mathbf{a}) \mathbf{v}_y,$$

where  $O_H^I(\mathbf{a})$ , is the objective related to the  $\Omega_H^I(\mathbf{a})$  model. The confidence value of a rule of length  $T$ , for instance  $S$ , with body  $B_{r_1} \wedge B_{r_2} \wedge \dots \wedge B_{r_T}$ , is

$$\alpha_S^* = \prod_{i=1}^T a_{i,r_i}^*.$$

Therefore changing a body atom  $B_{r_i}$  to  $B_{r'_i}$  in  $S$ , does not decrease the confidence value iff  $a_{i,r'_i}^* \leq a_{i,r_i}^*$ . Let  $a_{i,r_i}^*$  be the maximum element of the sequence  $a_{i,1}^*, \dots, a_{i,|\mathcal{R}|}^*$ . By consequently changing  $B_{r_i}$  in  $S$  to  $B_{r_i^*}$  (for  $i$ 's where  $r_i^* \neq r_i$ ) we obtain a sequence of rules of length  $T$ , with non-decreasing confidence values. The distance between any two consecutive elements in that sequence is 1. The last element of the sequence ( $S^*$ ) is the rule with the highest confidence value among length  $T$  rules, and the length of the sequence is  $d(S, S^*) + 1$ .

To prove the theorem, it is sufficient to substitute  $S$  with  $R_o$  and  $R_s$  to obtain two sequences of rules, with lengths  $d(R_o, S^*) + 1$  and  $d(R_s, S^*) + 1$ , respectively. by reversing the sequence related to  $R_s$  and concatenate it with the other sequence, we have a sequence of length  $d(R_o, S^*) + d(R_s, S^*) + 1$ , satisfying the conditions required to prove the theorem (after excluding  $R_o$  and  $R_s$ ).

The confidences values for the rules in the sequence satisfy the condition  $\alpha_l \geq \min(\alpha_o, \alpha_s)$ , because all the rules in the sequence related to  $R_s$  ( $R_o$ ) and  $S^*$  have larger or equal confidence value to  $R_s$  ( $R_o$ ). And since  $d(.,.)$  is a valid distance function it satisfies the triangle inequality; therefore  $d(R_o, R_s) \leq d(R_o, S^*) + d(R_s, S^*)$ , which implies  $d(R_s, R_o) \leq \ell + 1$ .  $\square$

Table 1: Comparison with other reasoning methods, an extension to the table 2 in the paper

| Datasets         | UMLS |        |        |         | Kinship |        |        |         |
|------------------|------|--------|--------|---------|---------|--------|--------|---------|
|                  | MRR  | Hits@1 | Hits@3 | Hits@10 | MRR     | Hits@1 | Hits@3 | Hits@10 |
| ConvE            | 0.94 | 0.92   | 0.96   | 0.99    | 0.83    | 0.98   | 0.92   | 0.98    |
| ComplEx          | 0.89 | 0.82   | 0.96   | 1       | 0.81    | 0.7    | 0.89   | 0.98    |
| MINERVA          | 0.82 | 0.73   | 0.90   | 0.97    | 0.72    | 0.60   | 0.81   | 0.92    |
| NTP <sup>1</sup> | 0.88 | 0.82   | 0.92   | 0.97    | 0.6     | 0.48   | 0.7    | 0.78    |
| NTP- $\lambda^1$ | 0.93 | 0.87   | 0.98   | 1       | 0.8     | 0.76   | 0.82   | 0.89    |
| NTP 2.0          | 0.76 | 0.68   | 0.81   | 0.88    | 0.65    | 0.57   | 0.69   | 0.81    |
| DRUM             | 0.81 | 0.67   | 0.94   | 0.98    | 0.61    | 0.46   | 0.71   | 0.91    |

Table 2: Transductive link prediction results

|           | WN18 |      |      |      | FB15K |      |      |      |
|-----------|------|------|------|------|-------|------|------|------|
|           | MRR  | Hits |      |      | MRR   | Hits |      |      |
|           |      | @10  | @3   | @1   |       | @10  | @3   | @1   |
| DistMult  | .822 | .936 | .914 | .728 | .XXX  | .XXX | .XXX | .XXX |
| ComplEx   | .941 | .947 | .936 | .936 | .XXX  | .XXX | .XXX | .XXX |
| Gaifman   | –    | .939 | –    | .761 | –     | –    | –    | –    |
| R-GCN     | .814 | .964 | .929 | .697 | .XXX  | .XXX | .XXX | .XXX |
| TransE    | .495 | .943 | .888 | .113 | .XXX  | .XXX | .XXX | .XXX |
| ConvE     | .943 | .956 | .946 | .935 | .XXX  | .XXX | .XXX | .XXX |
| Neural LP | .94  | .945 | –    | –    | .XXX  | .XXX | –    | –    |
| DRUM      | .944 | .954 | .943 | .939 | .XXX  | .XXX | .XXX | .XXX |

Table 3: Transductive link prediction results

|           | WN18 |      |      |      |
|-----------|------|------|------|------|
|           | MRR  | Hits |      |      |
|           |      | @10  | @3   | @1   |
| DistMult  | .822 | .936 | .914 | .728 |
| ComplEx   | .941 | .947 | .936 | .936 |
| Gaifman   | –    | .939 | –    | .761 |
| R-GCN     | .814 | .964 | .929 | .697 |
| TransE    | .495 | .943 | .888 | .113 |
| ConvE     | .943 | .956 | .946 | .935 |
| Neural LP | .94  | .945 | –    | –    |
| DRUM      | .944 | .954 | .943 | .939 |

| Head     | brother(., .)                                                                                                                                                                                                                                                                                                                                                                                                                                                                                                                               | wife(., .)                                                                                                                                                                                                                                                                                                                                                                                                                                                                         | son(., .)                                                                                                                                                                                                                                                                                                                                                                                                                                                                                                                                               |
|----------|---------------------------------------------------------------------------------------------------------------------------------------------------------------------------------------------------------------------------------------------------------------------------------------------------------------------------------------------------------------------------------------------------------------------------------------------------------------------------------------------------------------------------------------------|------------------------------------------------------------------------------------------------------------------------------------------------------------------------------------------------------------------------------------------------------------------------------------------------------------------------------------------------------------------------------------------------------------------------------------------------------------------------------------|---------------------------------------------------------------------------------------------------------------------------------------------------------------------------------------------------------------------------------------------------------------------------------------------------------------------------------------------------------------------------------------------------------------------------------------------------------------------------------------------------------------------------------------------------------|
| NeuralLP | (B, A) $\leftarrow$ inv_sister(B, A)<br>(C, A) $\leftarrow$ inv_sister(B, A), inv_sister(C, B)<br>(C, A) $\leftarrow$ inv_brother(B, A), inv_sister(C, B)<br>(B, A) $\leftarrow$ inv_brother(B, A)<br>(C, A) $\leftarrow$ inv_sister(B, A), inv_brother(C, B)<br>(C, A) $\leftarrow$ inv_brother(B, A), inv_brother(C, B)<br>(B, A) $\leftarrow$ son(B, A)<br>(C, A) $\leftarrow$ inv_sister(B, A), son(C, B)<br>N/A<br>N/A                                                                                                                 | (C, A) $\leftarrow$ inv_husband(B, A), inv_husband(C, B)<br>(B, A) $\leftarrow$ inv_husband(B, A)<br>(C, A) $\leftarrow$ daughter(B, A), inv_husband(C, B)<br>(C, A) $\leftarrow$ wife(B, A), inv_husband(C, B)<br>(C, A) $\leftarrow$ inv_husband(B, A), mother(C, B)<br>(C, A) $\leftarrow$ mother(B, A), inv_husband(C, B)<br>N/A<br>N/A<br>N/A<br>N/A                                                                                                                          | (C, A) $\leftarrow$ son(B, A), brother(C, B)<br>(B, A) $\leftarrow$ brother(B, A)<br>(C, A) $\leftarrow$ son(B, A), inv_mother(C, B)<br>(C, A) $\leftarrow$ inv_mother(B, A), brother(C, B)<br>(B, A) $\leftarrow$ inv_mother(B, A)<br>(C, A) $\leftarrow$ inv_mother(B, A), inv_mother(C, B)<br>(C, A) $\leftarrow$ inv_husband(B, A), brother(C, B)<br>(C, A) $\leftarrow$ inv_father(B, A), brother(C, B)<br>(C, A) $\leftarrow$ inv_husband(B, A), inv_mother(C, B)<br>(C, A) $\leftarrow$ inv_father(B, A), inv_mother(C, B)                       |
| DRUM     | (C, A) $\leftarrow$ nephew(A, B), uncle(B, C)<br>(C, A) $\leftarrow$ nephew(A, B), inv_nephew(B, C)<br>(C, A) $\leftarrow$ brother(A, B), sister(B, C)<br>(C, A) $\leftarrow$ brother(A, B), inv_sister(B, C)<br>(C, A) $\leftarrow$ brother(A, B), inv_brother(B, C)<br>(C, A) $\leftarrow$ brother(A, B), brother(B, C)<br>(C, A) $\leftarrow$ nephew(A, B), inv_niece(B, C)<br>(C, A) $\leftarrow$ nephew(A, B), aunt(B, C)<br>(C, A) $\leftarrow$ inv_uncle(A, B), uncle(B, C)<br>(C, A) $\leftarrow$ inv_uncle(A, B), inv_nephew(B, C) | (A, B) $\leftarrow$ inv_husband(A, B)<br>(C, A) $\leftarrow$ mother(A, B), inv_father(B, C)<br>(C, A) $\leftarrow$ inv_son(A, B), inv_father(B, C)<br>(C, A) $\leftarrow$ mother(A, B), son(B, C)<br>(C, A) $\leftarrow$ inv_son(A, B), son(B, C)<br>(C, A) $\leftarrow$ mother(A, B), daughter(B, C)<br>(C, A) $\leftarrow$ inv_son(A, B), daughter(B, C)<br>(C, A) $\leftarrow$ inv_daughter(A, B), inv_father(B, C)<br>(C, A) $\leftarrow$ inv_daughter(A, B), son(B, C)<br>N/A | (C, A) $\leftarrow$ nephew(A, B), brother(B, C)<br>(C, A) $\leftarrow$ brother(A, B), inv_mother(B, C)<br>(C, A) $\leftarrow$ brother(A, B), daughter(B, C)<br>(C, A) $\leftarrow$ brother(A, B), son(B, C)<br>(C, A) $\leftarrow$ brother(A, B), inv_father(B, C)<br>(C, A) $\leftarrow$ inv_sister(A, B), inv_mother(B, C)<br>(C, A) $\leftarrow$ inv_sister(A, B), daughter(B, C)<br>(C, A) $\leftarrow$ inv_sister(A, B), son(B, C)<br>(C, A) $\leftarrow$ inv_sister(A, B), inv_father(B, C)<br>(C, A) $\leftarrow$ inv_uncle(A, B), brother(B, C) |

Table 4: Examples of top rules obtained by each system learned on *family* dataset
